# Supplementary material
Source: publisher site journal article supplement (https://www.dovepress.com/get_supplementary_file.php?f=314076.xlsx)
Supplement: Supplementary file 1 [file get_supplementary_file.php]

## Sheet: Sheet 1
Detailed KEGG PATHWAY analysis data of potential targets by Metascape
Category	Term	Description	GeneRatio	BgRatio	pvalue	p.adjust	qvalue	geneID	Count
KEGG	hsa05161	Hepatitis B	14/32	162/8076	3.34662e-16	6.96098e-14	2.32502e-14	AKT1/BAX/BCL2/CASP3/CREB1/IL6/MYC/MYD88/MAPK1/RELA/TGFB1/TLR4/TNF/TP53	14
KEGG	hsa05152	Tuberculosis	14/32	180/8076	1.49414e-15	1.55391e-13	5.19018e-14	AKT1/BAX/BCL2/CALM1/CASP3/CREB1/IL1B/IL6/MYD88/MAPK1/RELA/TGFB1/TLR4/TNF	14
KEGG	hsa05163	Human cytomegalovirus infection	14/32	225/8076	3.43182e-14	2.3794e-12	7.94737e-13	AKT1/BAX/CALM1/CASP3/CREB1/IL1B/IL6/MYC/MAPK1/PTGS2/RELA/TNF/TP53/VEGFA	14
KEGG	hsa04933	AGE-RAGE signaling pathway in diabetic complications	11/32	100/8076	6.22323e-14	3.23608e-12	1.08088e-12	AKT1/BAX/BCL2/CASP3/IL1B/IL6/MAPK1/RELA/TGFB1/TNF/VEGFA	11
KEGG	hsa05167	Kaposi sarcoma-associated herpesvirus infection	13/32	193/8076	1.29239e-13	5.37634e-12	1.79574e-12	AKT1/BAX/CALM1/CASP3/CREB1/IL6/MYC/MAPK1/PTGS2/RELA/TP53/VEGFA/BECN1	13
KEGG	hsa05133	Pertussis	10/32	76/8076	1.61538e-13	5.59999e-12	1.87044e-12	CALM1/CASP1/CASP3/IL1B/IL6/MYD88/MAPK1/RELA/TLR4/TNF	10
KEGG	hsa05132	Salmonella infection	13/32	249/8076	3.43831e-12	1.02167e-10	3.41246e-11	AKT1/BAX/BCL2/CASP1/CASP3/IL1B/IL6/MYC/MYD88/MAPK1/RELA/TLR4/TNF	13
KEGG	hsa05164	Influenza A	11/32	171/8076	2.44029e-11	6.34475e-10	2.1192e-10	AKT1/BAX/CASP1/CASP3/IL1B/IL6/MYD88/MAPK1/RELA/TLR4/TNF	11
KEGG	hsa05134	Legionellosis	8/32	57/8076	3.41248e-11	7.88662e-10	2.63419e-10	CASP1/CASP3/IL1B/IL6/MYD88/RELA/TLR4/TNF	8
KEGG	hsa05131	Shigellosis	12/32	246/8076	6.42745e-11	1.33691e-09	4.46539e-10	AKT1/BAX/BCL2/CASP1/IL1B/MYD88/MAPK1/RELA/TLR4/TNF/TP53/BECN1	12
KEGG	hsa05162	Measles	10/32	139/8076	7.69866e-11	1.45575e-09	4.86231e-10	AKT1/BAX/BCL2/CASP3/IL1B/IL6/MYD88/RELA/TLR4/TP53	10
KEGG	hsa05142	Chagas disease	9/32	102/8076	1.26059e-10	2.18503e-09	7.29816e-10	AKT1/IL1B/IL6/MYD88/MAPK1/RELA/TGFB1/TLR4/TNF	9
KEGG	hsa05169	Epstein-Barr virus infection	11/32	202/8076	1.48903e-10	2.23501e-09	7.46511e-10	AKT1/BAX/BCL2/CASP3/HES1/IL6/MYC/MYD88/RELA/TNF/TP53	11
KEGG	hsa04625	C-type lectin receptor signaling pathway	9/32	104/8076	1.50433e-10	2.23501e-09	7.46511e-10	AKT1/CALM1/CASP1/IL1B/IL6/MAPK1/PTGS2/RELA/TNF	9
KEGG	hsa04668	TNF signaling pathway	9/32	112/8076	2.94673e-10	3.83075e-09	1.2795e-09	AKT1/CASP3/CREB1/IL1B/IL6/MAPK1/PTGS2/RELA/TNF	9
KEGG	hsa05145	Toxoplasmosis	9/32	112/8076	2.94673e-10	3.83075e-09	1.2795e-09	AKT1/BCL2/CASP3/MYD88/MAPK1/RELA/TGFB1/TLR4/TNF	9
KEGG	hsa05140	Leishmaniasis	8/32	77/8076	4.12038e-10	5.04141e-09	1.68387e-09	IL1B/MYD88/MAPK1/PTGS2/RELA/TGFB1/TLR4/TNF	8
KEGG	hsa05210	Colorectal cancer	8/32	86/8076	1.0144e-09	1.1722e-08	3.91525e-09	AKT1/BAX/BCL2/CASP3/MYC/MAPK1/TGFB1/TP53	8
KEGG	hsa01523	Antifolate resistance	6/32	31/8076	1.61876e-09	1.70231e-08	5.68586e-09	ABCC2/IL1B/IL6/RELA/TNF/ABCG2	6
KEGG	hsa04210	Apoptosis	9/32	136/8076	1.68661e-09	1.70231e-08	5.68586e-09	AKT1/BAX/BCL2/CASP3/ERN1/MAPK1/RELA/TNF/TP53	9
KEGG	hsa05222	Small cell lung cancer	8/32	92/8076	1.75129e-09	1.70231e-08	5.68586e-09	AKT1/BAX/BCL2/CASP3/MYC/PTGS2/RELA/TP53	8
KEGG	hsa05135	Yersinia infection	9/32	137/8076	1.80052e-09	1.70231e-08	5.68586e-09	AKT1/CASP1/IL1B/IL6/MYD88/MAPK1/RELA/TLR4/TNF	9
KEGG	hsa05130	Pathogenic Escherichia coli infection	10/32	197/8076	2.40188e-09	2.17214e-08	7.25511e-09	BAX/CASP1/CASP3/IL1B/IL6/MYD88/MAPK1/RELA/TLR4/TNF	10
KEGG	hsa04932	Non-alcoholic fatty liver disease	9/32	150/8076	4.03051e-09	3.49311e-08	1.16673e-08	AKT1/BAX/CASP3/ERN1/IL1B/IL6/RELA/TGFB1/TNF	9
KEGG	hsa04620	Toll-like receptor signaling pathway	8/32	104/8076	4.69362e-09	3.90509e-08	1.30433e-08	AKT1/IL1B/IL6/MYD88/MAPK1/RELA/TLR4/TNF	8
KEGG	hsa05170	Human immunodeficiency virus 1 infection	10/32	212/8076	4.89809e-09	3.91847e-08	1.3088e-08	AKT1/BAX/BCL2/CALM1/CASP3/MYD88/MAPK1/RELA/TLR4/TNF	10
KEGG	hsa05166	Human T-cell leukemia virus 1 infection	10/32	219/8076	6.70584e-09	5.16598e-08	1.72548e-08	AKT1/BAX/CREB1/IL6/MYC/MAPK1/RELA/TGFB1/TNF/TP53	10
KEGG	hsa04010	MAPK signaling pathway	11/32	294/8076	8.05867e-09	5.98644e-08	1.99952e-08	AKT1/CASP3/IL1B/MYC/MYD88/MAPK1/RELA/TGFB1/TNF/TP53/VEGFA	11
KEGG	hsa01524	Platinum drug resistance	7/32	73/8076	1.03351e-08	7.41277e-08	2.47593e-08	AKT1/BAX/BCL2/CASP3/ABCC2/MAPK1/TP53	7
KEGG	hsa04071	Sphingolipid signaling pathway	8/32	119/8076	1.37299e-08	8.94025e-08	2.98612e-08	AKT1/BAX/BCL2/OPRD1/MAPK1/RELA/TNF/TP53	8
KEGG	hsa05212	Pancreatic cancer	7/32	76/8076	1.37542e-08	8.94025e-08	2.98612e-08	AKT1/BAX/MAPK1/RELA/TGFB1/TP53/VEGFA	7
KEGG	hsa05220	Chronic myeloid leukemia	7/32	76/8076	1.37542e-08	8.94025e-08	2.98612e-08	AKT1/BAX/MYC/MAPK1/RELA/TGFB1/TP53	7
KEGG	hsa04621	NOD-like receptor signaling pathway	9/32	181/8076	2.10417e-08	1.32626e-07	4.42983e-08	BCL2/CASP1/IL1B/IL6/MYD88/MAPK1/RELA/TLR4/TNF	9
KEGG	hsa05165	Human papillomavirus infection	11/32	331/8076	2.76882e-08	1.69386e-07	5.65764e-08	AKT1/BAX/CASP3/CREB1/HES1/MAPK1/PTGS2/RELA/TNF/TP53/VEGFA	11
KEGG	hsa05144	Malaria	6/32	50/8076	3.31455e-08	1.96979e-07	6.57925e-08	IL1B/IL6/MYD88/TGFB1/TLR4/TNF	6
KEGG	hsa05418	Fluid shear stress and atherosclerosis	8/32	139/8076	4.67197e-08	2.69936e-07	9.01609e-08	AKT1/BCL2/CALM1/IL1B/RELA/TNF/TP53/VEGFA	8
KEGG	hsa04657	IL-17 signaling pathway	7/32	94/8076	6.13116e-08	3.39823e-07	1.13504e-07	CASP3/IL1B/IL6/MAPK1/PTGS2/RELA/TNF	7
KEGG	hsa05205	Proteoglycans in cancer	9/32	205/8076	6.20831e-08	3.39823e-07	1.13504e-07	AKT1/CASP3/MYC/MAPK1/TGFB1/TLR4/TNF/TP53/VEGFA	9
KEGG	hsa05226	Gastric cancer	8/32	149/8076	8.04148e-08	4.28879e-07	1.43249e-07	AKT1/BAX/BCL2/MYC/ABCB1/MAPK1/TGFB1/TP53	8
KEGG	hsa05010	Alzheimer disease	11/32	369/8076	8.47802e-08	4.40857e-07	1.4725e-07	AKT1/CALM1/CASP3/ERN1/IL1B/IL6/MAPK1/PTGS2/RELA/TNF/BECN1	11
KEGG	hsa05146	Amoebiasis	7/32	102/8076	1.08224e-07	5.49041e-07	1.83384e-07	CASP3/IL1B/IL6/RELA/TGFB1/TLR4/TNF	7
KEGG	hsa05022	Pathways of neurodegeneration - multiple diseases	12/32	475/8076	1.14414e-07	5.56013e-07	1.85713e-07	BAX/BCL2/CALM1/CASP3/ERN1/IL1B/IL6/MAPK1/PTGS2/RELA/TNF/BECN1	12
KEGG	hsa04218	Cellular senescence	8/32	156/8076	1.14945e-07	5.56013e-07	1.85713e-07	AKT1/CALM1/IL6/MYC/MAPK1/RELA/TGFB1/TP53	8
KEGG	hsa05160	Hepatitis C	8/32	157/8076	1.20793e-07	5.7102e-07	1.90725e-07	AKT1/BAX/CASP3/MYC/MAPK1/RELA/TNF/TP53	8
KEGG	hsa04064	NF-kappa B signaling pathway	7/32	104/8076	1.23817e-07	5.72309e-07	1.91156e-07	BCL2/IL1B/MYD88/PTGS2/RELA/TLR4/TNF	7
KEGG	hsa05321	Inflammatory bowel disease	6/32	65/8076	1.6527e-07	7.47309e-07	2.49607e-07	IL1B/IL6/RELA/TGFB1/TLR4/TNF	6
KEGG	hsa04066	HIF-1 signaling pathway	7/32	109/8076	1.71314e-07	7.58156e-07	2.5323e-07	AKT1/BCL2/IL6/MAPK1/RELA/TLR4/VEGFA	7
KEGG	hsa04722	Neurotrophin signaling pathway	7/32	119/8076	3.13383e-07	1.35799e-06	4.5358e-07	AKT1/BAX/BCL2/CALM1/MAPK1/RELA/TP53	7
KEGG	hsa04380	Osteoclast differentiation	7/32	128/8076	5.15953e-07	2.19017e-06	7.31534e-07	AKT1/CREB1/IL1B/MAPK1/RELA/TGFB1/TNF	7
KEGG	hsa01521	EGFR tyrosine kinase inhibitor resistance	6/32	79/8076	5.34982e-07	2.22552e-06	7.43343e-07	AKT1/BAX/BCL2/IL6/MAPK1/VEGFA	6
KEGG	hsa04151	PI3K-Akt signaling pathway	10/32	354/8076	6.27444e-07	2.55899e-06	8.54723e-07	AKT1/BCL2/CREB1/IL6/MYC/MAPK1/RELA/TLR4/TP53/VEGFA	10
KEGG	hsa05323	Rheumatoid arthritis	6/32	93/8076	1.41113e-06	5.64453e-06	1.88532e-06	IL1B/IL6/TGFB1/TLR4/TNF/VEGFA	6
KEGG	hsa05215	Prostate cancer	6/32	97/8076	1.80918e-06	7.10016e-06	2.37151e-06	AKT1/BCL2/CREB1/MAPK1/RELA/TP53	6
KEGG	hsa05213	Endometrial cancer	5/32	58/8076	2.78299e-06	1.07197e-05	3.58046e-06	AKT1/BAX/MYC/MAPK1/TP53	5
KEGG	hsa04215	Apoptosis - multiple species	4/32	32/8076	6.75464e-06	2.55448e-05	8.53218e-06	BAX/BCL2/CASP3/BECN1	4
KEGG	hsa04926	Relaxin signaling pathway	6/32	129/8076	9.52777e-06	3.53888e-05	1.18202e-05	AKT1/CREB1/MAPK1/RELA/TGFB1/VEGFA	6
KEGG	hsa05214	Glioma	5/32	75/8076	9.99609e-06	3.6477e-05	1.21836e-05	AKT1/BAX/CALM1/MAPK1/TP53	5
KEGG	hsa05143	African trypanosomiasis	4/32	37/8076	1.22346e-05	4.31323e-05	1.44065e-05	IL1B/IL6/MYD88/TNF	4
KEGG	hsa05216	Thyroid cancer	4/32	37/8076	1.22346e-05	4.31323e-05	1.44065e-05	BAX/MYC/MAPK1/TP53	4
KEGG	hsa05168	Herpes simplex virus 1 infection	10/32	498/8076	1.36374e-05	4.72764e-05	1.57907e-05	AKT1/BAX/BCL2/CASP3/IL1B/IL6/MYD88/RELA/TNF/TP53	10
KEGG	hsa05219	Bladder cancer	4/32	41/8076	1.85527e-05	6.32616e-05	2.11299e-05	MYC/MAPK1/TP53/VEGFA	4
KEGG	hsa05224	Breast cancer	6/32	147/8076	2.01352e-05	6.67795e-05	2.23049e-05	AKT1/BAX/HES1/MYC/MAPK1/TP53	6
KEGG	hsa05206	MicroRNAs in cancer	8/32	310/8076	2.02265e-05	6.67795e-05	2.23049e-05	BCL2/CASP3/MYC/ABCB1/MAPK1/PTGS2/TP53/VEGFA	8
KEGG	hsa04211	Longevity regulating pathway	5/32	89/8076	2.31168e-05	7.39739e-05	2.47079e-05	AKT1/BAX/CREB1/RELA/TP53	5
KEGG	hsa05235	PD-L1 expression and PD-1 checkpoint pathway in cancer	5/32	89/8076	2.31168e-05	7.39739e-05	2.47079e-05	AKT1/MYD88/MAPK1/RELA/TLR4	5
KEGG	hsa04217	Necroptosis	6/32	159/8076	3.14304e-05	9.90533e-05	3.30846e-05	BAX/BCL2/CASP1/IL1B/TLR4/TNF	6
KEGG	hsa01522	Endocrine resistance	5/32	98/8076	3.68813e-05	0.000114497	3.82429e-05	AKT1/BAX/BCL2/MAPK1/TP53	5
KEGG	hsa05225	Hepatocellular carcinoma	6/32	168/8076	4.28725e-05	0.000131139	4.38016e-05	AKT1/BAX/MYC/MAPK1/TGFB1/TP53	6
KEGG	hsa04659	Th17 cell differentiation	5/32	107/8076	5.62987e-05	0.000169712	5.66852e-05	IL1B/IL6/MAPK1/RELA/TGFB1	5
KEGG	hsa04931	Insulin resistance	5/32	108/8076	5.88667e-05	0.000174918	5.84241e-05	AKT1/CREB1/IL6/RELA/TNF	5
KEGG	hsa05014	Amyotrophic lateral sclerosis	8/32	364/8076	6.39871e-05	0.000187455	6.26115e-05	BAX/BCL2/CASP1/CASP3/ERN1/TNF/TP53/BECN1	8
KEGG	hsa04725	Cholinergic synapse	5/32	113/8076	7.30964e-05	0.000211167	7.05316e-05	ACHE/AKT1/BCL2/CREB1/MAPK1	5
KEGG	hsa05020	Prion disease	7/32	273/8076	7.60342e-05	0.000216645	7.23613e-05	BAX/CASP3/CREB1/IL1B/IL6/MAPK1/TNF	7
KEGG	hsa04370	VEGF signaling pathway	4/32	59/8076	7.93139e-05	0.000222936	7.44626e-05	AKT1/MAPK1/PTGS2/VEGFA	4
KEGG	hsa04623	Cytosolic DNA-sensing pathway	4/32	63/8076	0.000102659	0.000284708	9.50946e-05	CASP1/IL1B/IL6/RELA	4
KEGG	hsa05203	Viral carcinogenesis	6/32	204/8076	0.000126324	0.000345729	0.000115476	BAX/CASP3/CREB1/MAPK1/RELA/TP53	6
KEGG	hsa05221	Acute myeloid leukemia	4/32	67/8076	0.000130639	0.000352895	0.00011787	AKT1/MYC/MAPK1/RELA	4
KEGG	hsa05211	Renal cell carcinoma	4/32	69/8076	0.00014653	0.000390746	0.000130512	AKT1/MAPK1/TGFB1/VEGFA	4
KEGG	hsa05230	Central carbon metabolism in cancer	4/32	70/8076	0.00015498	0.000408048	0.000136291	AKT1/MYC/MAPK1/TP53	4
KEGG	hsa05218	Melanoma	4/32	72/8076	0.00017293	0.000444068	0.000148322	AKT1/BAX/MAPK1/TP53	4
KEGG	hsa05223	Non-small cell lung cancer	4/32	72/8076	0.00017293	0.000444068	0.000148322	AKT1/BAX/MAPK1/TP53	4
KEGG	hsa04140	Autophagy - animal	5/32	137/8076	0.0001819	0.000457219	0.000152715	AKT1/BCL2/ERN1/MAPK1/BECN1	5
KEGG	hsa04115	p53 signaling pathway	4/32	73/8076	0.000182448	0.000457219	0.000152715	BAX/BCL2/CASP3/TP53	4
KEGG	hsa04915	Estrogen signaling pathway	5/32	138/8076	0.000188211	0.000466045	0.000155663	AKT1/BCL2/CALM1/CREB1/MAPK1	5
KEGG	hsa04261	Adrenergic signaling in cardiomyocytes	5/32	150/8076	0.000277769	0.000679718	0.000227031	AKT1/BCL2/CALM1/CREB1/MAPK1	5
KEGG	hsa04022	cGMP-PKG signaling pathway	5/32	167/8076	0.000456182	0.00110332	0.000368519	AKT1/CALM1/CREB1/OPRD1/MAPK1	5
KEGG	hsa04350	TGF-beta signaling pathway	4/32	94/8076	0.000482234	0.00115293	0.000385087	MYC/MAPK1/TGFB1/TNF	4
KEGG	hsa05332	Graft-versus-host disease	3/32	42/8076	0.000584152	0.00138072	0.000461172	IL1B/IL6/TNF	3
KEGG	hsa04660	T cell receptor signaling pathway	4/32	104/8076	0.000707232	0.00165286	0.000552068	AKT1/MAPK1/RELA/TNF	4
KEGG	hsa02010	ABC transporters	3/32	45/8076	0.000716248	0.00165533	0.000552893	ABCC2/ABCB1/ABCG2	3
KEGG	hsa05202	Transcriptional misregulation in cancer	5/32	192/8076	0.000861172	0.00196839	0.000657459	BAX/IL6/MYC/RELA/TP53	5
KEGG	hsa05016	Huntington disease	6/32	306/8076	0.00110908	0.00250749	0.000837522	BAX/CASP3/CREB1/ERN1/TP53/BECN1	6
KEGG	hsa04919	Thyroid hormone signaling pathway	4/32	121/8076	0.0012465	0.00278786	0.000931168	AKT1/MYC/MAPK1/TP53	4
KEGG	hsa04024	cAMP signaling pathway	5/32	216/8076	0.00145947	0.00322946	0.00107867	AKT1/CALM1/CREB1/MAPK1/RELA	5
KEGG	hsa04068	FoxO signaling pathway	4/32	131/8076	0.00167213	0.00366108	0.00122283	AKT1/IL6/MAPK1/TGFB1	4
KEGG	hsa04371	Apelin signaling pathway	4/32	137/8076	0.0019712	0.00424749	0.0014187	AKT1/CALM1/MAPK1/BECN1	4
KEGG	hsa00910	Nitrogen metabolism	2/32	17/8076	0.00199333	0.00424749	0.0014187	CA4/CA7	2
KEGG	hsa04014	Ras signaling pathway	5/32	232/8076	0.00200122	0.00424749	0.0014187	AKT1/CALM1/MAPK1/RELA/VEGFA	5
KEGG	hsa05017	Spinocerebellar ataxia	4/32	143/8076	0.0023056	0.00484409	0.00161796	AKT1/ERN1/KCND3/BECN1	4
KEGG	hsa04137	Mitophagy - animal	3/32	68/8076	0.00237811	0.0048975	0.0016358	RELA/TP53/BECN1	3
KEGG	hsa04664	Fc epsilon RI signaling pathway	3/32	68/8076	0.00237811	0.0048975	0.0016358	AKT1/MAPK1/TNF	3
KEGG	hsa04920	Adipocytokine signaling pathway	3/32	69/8076	0.00247955	0.00505633	0.00168886	AKT1/RELA/TNF	3
KEGG	hsa04917	Prolactin signaling pathway	3/32	70/8076	0.00258363	0.00521743	0.00174266	AKT1/MAPK1/RELA	3
KEGG	hsa05012	Parkinson disease	5/32	249/8076	0.00272552	0.00545104	0.00182069	BAX/CALM1/CASP3/ERN1/TP53	5
KEGG	hsa04630	JAK-STAT signaling pathway	4/32	162/8076	0.00362086	0.00717276	0.00239576	AKT1/BCL2/IL6/MYC	4
KEGG	hsa04662	B cell receptor signaling pathway	3/32	82/8076	0.00404756	0.00794238	0.00265282	AKT1/MAPK1/RELA	3
KEGG	hsa04012	ErbB signaling pathway	3/32	85/8076	0.00447807	0.00870502	0.00290755	AKT1/MYC/MAPK1	3
KEGG	hsa04976	Bile secretion	3/32	90/8076	0.00525551	0.0100289	0.00334972	ABCC2/ABCB1/ABCG2	3
KEGG	hsa05410	Hypertrophic cardiomyopathy	3/32	90/8076	0.00525551	0.0100289	0.00334972	IL6/TGFB1/TNF	3
KEGG	hsa04713	Circadian entrainment	3/32	97/8076	0.00647337	0.0122406	0.00408845	CALM1/CREB1/MAPK1	3
KEGG	hsa04640	Hematopoietic cell lineage	3/32	99/8076	0.00684973	0.0128355	0.00428717	IL1B/IL6/TNF	3
KEGG	hsa04916	Melanogenesis	3/32	101/8076	0.00723893	0.0134437	0.00449031	CALM1/CREB1/MAPK1	3
KEGG	hsa04510	Focal adhesion	4/32	201/8076	0.0077593	0.0142826	0.00477051	AKT1/BCL2/MAPK1/VEGFA	4
KEGG	hsa04928	Parathyroid hormone synthesis, secretion and action	3/32	106/8076	0.00826877	0.0150869	0.00503914	BCL2/CREB1/MAPK1	3
KEGG	hsa04922	Glucagon signaling pathway	3/32	107/8076	0.00848458	0.015346	0.0051257	AKT1/CALM1/CREB1	3
KEGG	hsa04015	Rap1 signaling pathway	4/32	210/8076	0.00902962	0.016191	0.00540794	AKT1/CALM1/MAPK1/VEGFA	4
KEGG	hsa04726	Serotonergic synapse	3/32	115/8076	0.0103312	0.0183666	0.00613459	CASP3/MAPK1/PTGS2	3
KEGG	hsa04935	Growth hormone synthesis, secretion and action	3/32	119/8076	0.0113357	0.0199815	0.00667398	AKT1/CREB1/MAPK1	3
KEGG	hsa04940	Type I diabetes mellitus	2/32	43/8076	0.0124135	0.0216975	0.00724716	IL1B/TNF	2
KEGG	hsa04110	Cell cycle	3/32	124/8076	0.0126685	0.0219587	0.00733437	MYC/TGFB1/TP53	3
KEGG	hsa04930	Type II diabetes mellitus	2/32	46/8076	0.0141236	0.0242786	0.00810925	MAPK1/TNF	2
KEGG	hsa04650	Natural killer cell mediated cytotoxicity	3/32	131/8076	0.0146803	0.0250287	0.00835977	CASP3/MAPK1/TNF	3
KEGG	hsa04728	Dopaminergic synapse	3/32	132/8076	0.0149817	0.0253349	0.00846205	AKT1/CALM1/CREB1	3
KEGG	hsa04672	Intestinal immune network for IgA production	2/32	49/8076	0.0159299	0.0265074	0.00885369	IL6/TGFB1	2
KEGG	hsa05030	Cocaine addiction	2/32	49/8076	0.0159299	0.0265074	0.00885369	CREB1/RELA	2
KEGG	hsa04910	Insulin signaling pathway	3/32	137/8076	0.0165416	0.0273068	0.0091207	AKT1/CALM1/MAPK1	3
KEGG	hsa04550	Signaling pathways regulating pluripotency of stem cells	3/32	143/8076	0.0185306	0.0303493	0.0101369	AKT1/MYC/MAPK1	3
KEGG	hsa04923	Regulation of lipolysis in adipocytes	2/32	57/8076	0.0211992	0.0344488	0.0115062	AKT1/PTGS2	2
KEGG	hsa04921	Oxytocin signaling pathway	3/32	154/8076	0.0225107	0.0362963	0.0121233	CALM1/MAPK1/PTGS2	3
KEGG	hsa04150	mTOR signaling pathway	3/32	155/8076	0.022894	0.0366305	0.0122349	AKT1/MAPK1/TNF	3
KEGG	hsa05217	Basal cell carcinoma	2/32	63/8076	0.0255629	0.0405885	0.0135569	BAX/TP53	2
KEGG	hsa04929	GnRH secretion	2/32	64/8076	0.0263231	0.0414788	0.0138543	AKT1/MAPK1	2
KEGG	hsa04060	Cytokine-cytokine receptor interaction	4/32	295/8076	0.028042	0.0438552	0.014648	IL1B/IL6/TGFB1/TNF	4
KEGG	hsa04720	Long-term potentiation	2/32	67/8076	0.0286583	0.0444845	0.0148582	CALM1/MAPK1	2
KEGG	hsa04141	Protein processing in endoplasmic reticulum	3/32	171/8076	0.0295155	0.0454758	0.0151893	BAX/BCL2/ERN1	3
KEGG	hsa04924	Renin secretion	2/32	69/8076	0.0302599	0.045942	0.015345	CALM1/CREB1	2
KEGG	hsa05031	Amphetamine addiction	2/32	69/8076	0.0302599	0.045942	0.015345	CALM1/CREB1	2
KEGG	hsa04622	RIG-I-like receptor signaling pathway	2/32	70/8076	0.0310739	0.046499	0.015531	RELA/TNF	2
KEGG	hsa05120	Epithelial cell signaling in Helicobacter pylori infection	2/32	70/8076	0.0310739	0.046499	0.015531	CASP3/RELA	2
KEGG	hsa05034	Alcoholism	3/32	187/8076	0.0370526	0.0550496	0.018387	CALM1/CREB1/MAPK1	3
KEGG	hsa04612	Antigen processing and presentation	2/32	78/8076	0.0378928	0.0558986	0.0186706	CREB1/TNF	2
KEGG	hsa04062	Chemokine signaling pathway	3/32	192/8076	0.039594	0.0579969	0.0193714	AKT1/MAPK1/RELA	3
KEGG	hsa04658	Th1 and Th2 cell differentiation	2/32	92/8076	0.0510512	0.0742563	0.0248022	MAPK1/RELA	2
KEGG	hsa04912	GnRH signaling pathway	2/32	93/8076	0.0520466	0.0751785	0.0251102	CALM1/MAPK1	2
KEGG	hsa00533	Glycosaminoglycan biosynthesis - keratan sulfate	1/32	14/8076	0.0541091	0.0776186	0.0259252	ST3GAL3	1
KEGG	hsa05414	Dilated cardiomyopathy	2/32	96/8076	0.0550749	0.0784629	0.0262072	TGFB1/TNF	2
KEGG	hsa04666	Fc gamma R-mediated phagocytosis	2/32	97/8076	0.0560981	0.0793769	0.0265125	AKT1/MAPK1	2
KEGG	hsa04925	Aldosterone synthesis and secretion	2/32	98/8076	0.0571281	0.0797492	0.0266369	CALM1/CREB1	2
KEGG	hsa05231	Choline metabolism in cancer	2/32	98/8076	0.0571281	0.0797492	0.0266369	AKT1/MAPK1	2
KEGG	hsa04061	Viral protein interaction with cytokine and cytokine receptor	2/32	100/8076	0.059208	0.0810215	0.0270618	IL6/TNF	2
KEGG	hsa04750	Inflammatory mediator regulation of TRP channels	2/32	100/8076	0.059208	0.0810215	0.0270618	CALM1/IL1B	2
KEGG	hsa04914	Progesterone-mediated oocyte maturation	2/32	100/8076	0.059208	0.0810215	0.0270618	AKT1/MAPK1	2
KEGG	hsa01210	2-Oxocarboxylic acid metabolism	1/32	19/8076	0.0727376	0.0988851	0.0330284	GPT	1
